# Supplementary material for: A microphysiological model of human trophoblast invasion during implantation
Source: PubMed Central journal article supplement (PMC8924260; doi:10.1038/s41467-022-28663-4), 2022-03-15
Supplement: 41467_2022_28663_MOESM1_ESM.pdf [file 41467_2022_28663_MOESM1_ESM.pdf]

# Supplementary Information (SI) Guide for

## A microphysiological model of human trophoblast invasion during implantation

<sup>1</sup>Ju Young Park, <sup>2</sup>Sneha Mani, <sup>3</sup>Jeremy Clair, <sup>3</sup>Heather M. Olson, <sup>3</sup>Vanessa L. Paurus, <sup>3</sup>Charles K. Ansong, <sup>1</sup>Cassidy Blundell, <sup>1</sup>Rachel Young, <sup>2</sup>Jessica Kanter, <sup>4</sup>Scott Gordon, <sup>1</sup>Alex Y. Yi, <sup>2</sup>Monica Mainigi\*, <sup>1,5,6</sup>Dan Dongeun Huh\*

Supplementary Information includes:

### Supplementary Figures 1-11

Supplementary Figure 1. Measurement of proliferative EVT population in the implantation-on-a-chip.

Supplementary Figure 2. Analysis of ECM stiffness in the implantation-on-a-chip.

Supplementary Figure 3. Comparison of invasive activity of primary EVT and HTR8/SVneo cells on the 'implantation-on-a-chip' device.

Supplementary Figure 4. Maintenance of the decidualized phenotype of stromal cells in the implantation-on-a-chip.

Supplementary Figure 5. Analysis of ECM composition and stiffness in the presence of different cell types in the hydrogel compartment.

Supplementary Figure 6. Secretomics analysis of effluent samples collected from implantation-on-a-chip in four different culture conditions: i) EVT-mono, ii) EC-mono, iii) CO, and iv) TRI (one-way ANOVA  $p < 0.05$ ).

Supplementary Figure 7. Secretomics analysis of human proteins only. Z scores and the results of t tests of the different proteins identified in the different culture conditions: i) EVT-mono, ii) EC-mono, iii) CO, and iv) TRI (two-sided t-test).

Supplementary Figure 8. Heatmap depicting the human proteins significantly regulated in abundance in the different culture conditions: i) EVT-mono, ii) EC-mono, iii) CO, and iv) TRI

Supplementary Figure 9. List of proteins showing significant increase or decrease between EVT monoculture and coculture of EVT and EC (two-sided t-test).

Supplementary Figure 10. List of proteins showing significant increase or decrease between EC monoculture and coculture of EVT and EC (two-sided t-test).

Supplementary Figure 11. Fourteen significantly upregulated endothelial proteins in the coculture configuration of the implantation-on-a-chip.

Supplementary Figure 12. Twelve significantly upregulated EVT proteins in coculture configuration of the implantation-on-a-chip.

Supplementary Figure 13. Viability and marker expression of DSCs and additional cell types in the implantation-on-a-chip.

Supplementary Table 1. Cells and authentication methods.

Supplementary Table 2. Primary and secondary antibodies for immunofluorescence staining.

**Supplementary Figure 1.** Measurement of proliferative EVT population in the implantation-on-a-chip. (a) Immunofluorescence staining of HLA-G (purple) and Ki67 (yellow) in EVT cells migrating in the ECM compartment at Day 6. The representative images are from three independent experiments. Scale bars, 50  $\mu$ m. (b) Cells isolated from the device were flow sorted. Analysis of single, live, and CD45-negative cells stained with HLA-G and Ki67 showed that 82% of HLA-G<sup>+</sup> cells were also Ki67 positive. FMO = fluorescence minus one control.

**a**

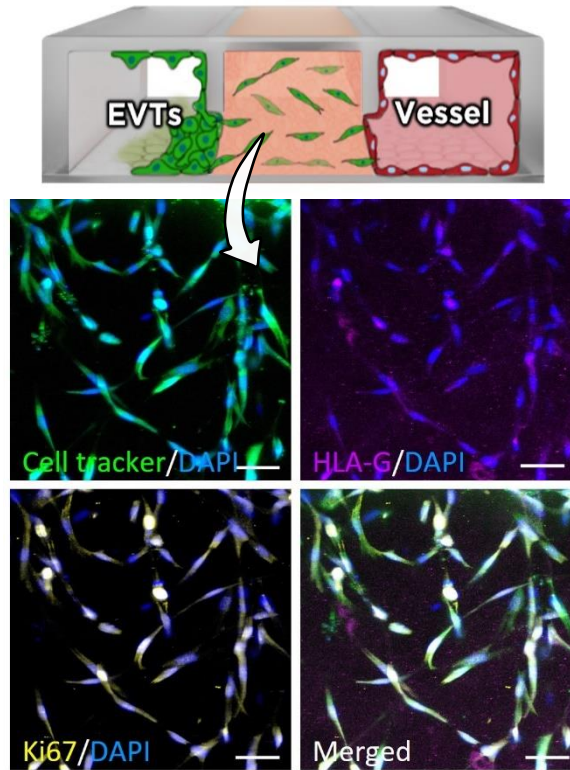

**b**

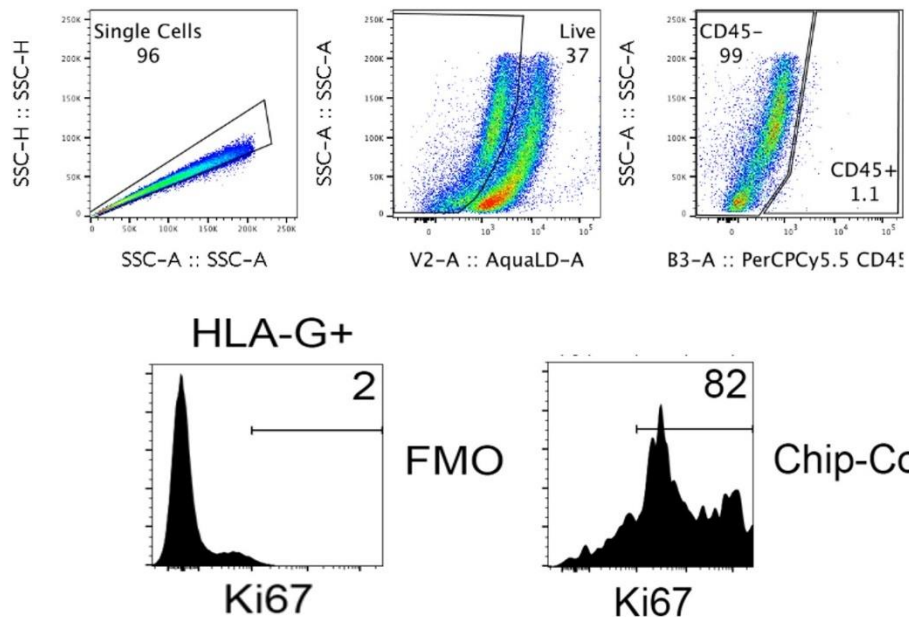

**Supplementary Figure 2.** Analysis of ECM stiffness in the implantation-on-a-chip. The plot shows the Young's modulus of ECM hydrogel created in the implantation-on-a-chip device prior to EVT invasion (left bar) and after 6 days of device culture (right bar). Data represent mean  $\pm$  SD from five independent devices (n=5). P values by unpaired, two-sided t-test.

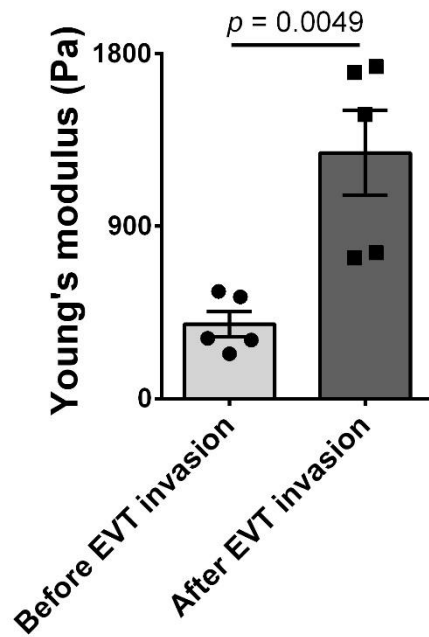

**Supplementary Figure 3.** Comparison of invasive activity of primary EVT<sub>s</sub> and HTR8/SVneo cells on the ‘implantation-on-a-chip’ device. (a) Invasion of primary EVT<sub>s</sub> in 2%FBS (first column) was compared to invasion of the HTR8-SVneo cell line in 2% FBS (second column) and 10% FBS (third column) at Day 1 (top panel) and Day 6 (bottom panel). The representative images are from three independent experiments (Scale bars, 200 μm). (b) Area invaded by the cells was quantified at day 6. Data represent mean ± SD from three independent devices (n=3). One-way ANOVA with Tukey’s multiple comparison test. Dashed lines indicate the boundary between the ECM hydrogel and the vascular compartment.

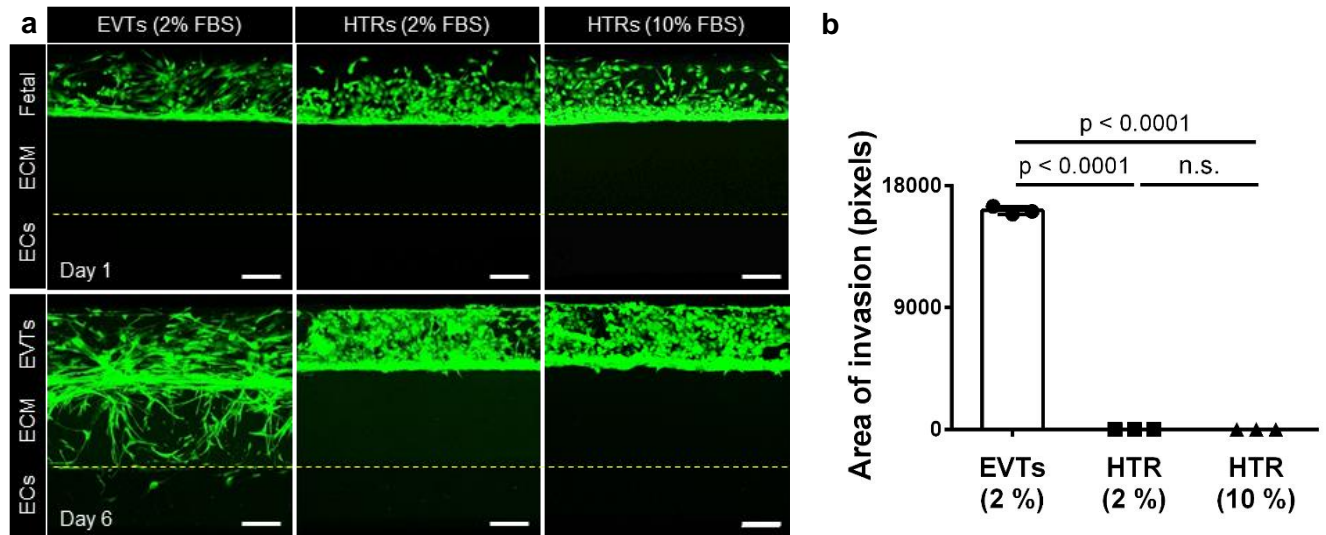

**Supplementary Figure 4.** Maintenance of the decidualized phenotype of stromal cells in the implantation-on-a-chip. Immunofluorescence staining of prolactin expression in DSCs cultured in the ECM compartment of the implantation-on-a-chip for 6 days without MPA,  $E_2$ , and cAMP. The representative images are from three independent experiments. The dashed lines show the boundary between the ECM compartment and side channels. F and V represent the fetal and vascular chambers, respectively. Scale bars, 100  $\mu$ m.

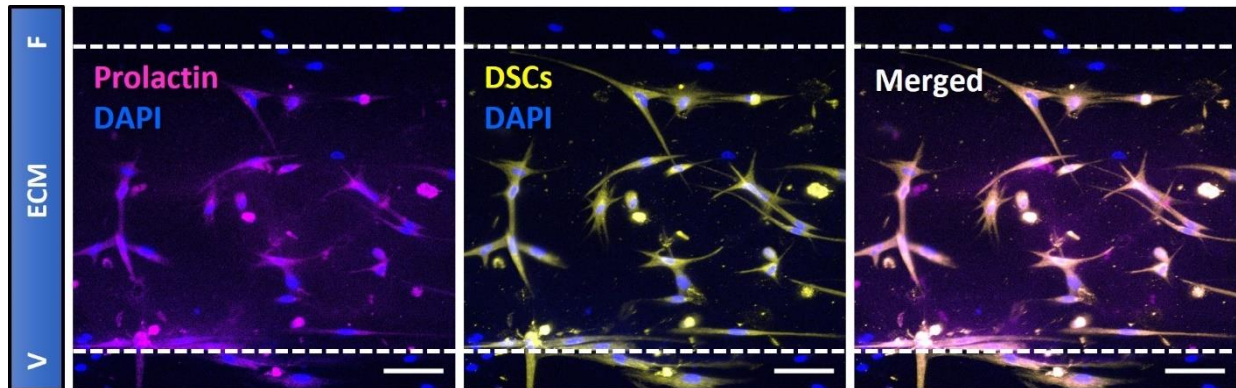

**Supplementary Figure 5.** Analysis of ECM composition and stiffness in the presence of different cell types in the hydrogel compartment. (a) Quantification of the immunofluorescence of collagen type I and laminin in DSC-, NHLF-, and hTEC-containing devices after 6 days of culture. Data represent mean  $\pm$  SD from four independent devices (n=4). One-way ANOVA with Tukey's multiple comparison test. MFI stands for mean fluorescence intensity. (b) Young's modulus of the Matrigel-collagen I mixture hydrogel scaffold containing different cell types after 6 days of device culture. Data represent mean  $\pm$  SD from five independent devices (n=5). One-way ANOVA with Tukey's multiple comparison test. n.s.; not significant

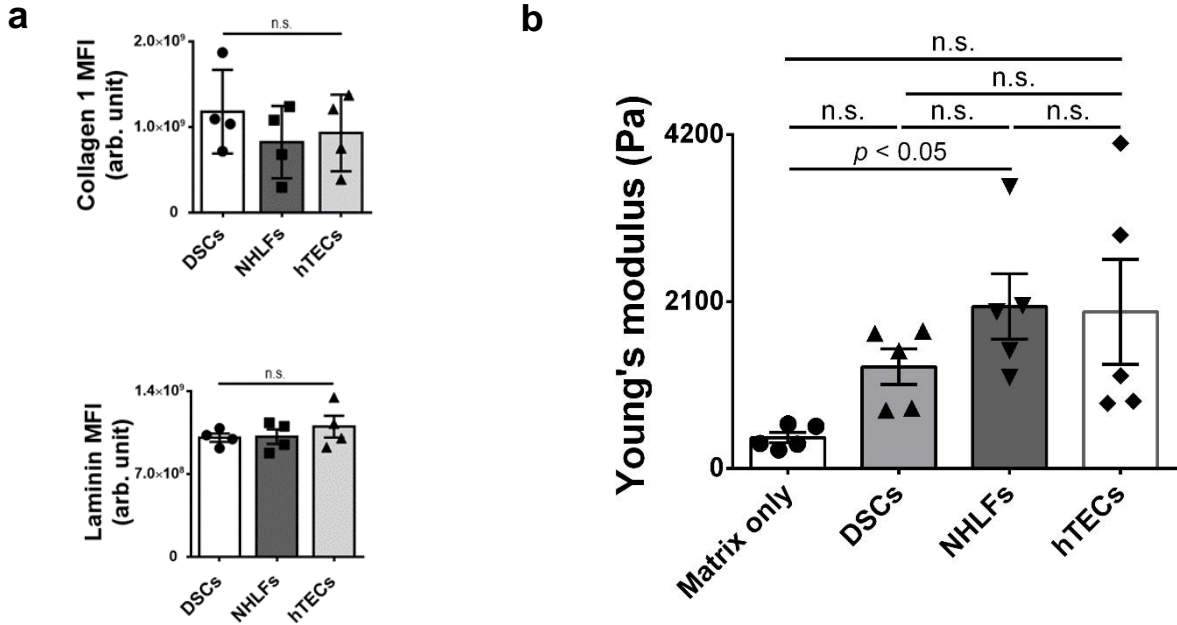







|     |                                                                  |   |   |   |  |       |
|-----|------------------------------------------------------------------|---|---|---|--|-------|
| 67  | Collagen type XV alpha 1 chain                                   | - | + | - |  | 0.006 |
| 68  | Ectonucleotide pyrophosphatase/phosphodiesterase family member 2 | - | + | - |  | 0.004 |
| 69  | Proteoglycan 4                                                   | + | + | - |  | 0.019 |
| 70  | Ig-like domain-containing protein                                | - | + | - |  | 0.007 |
| 71  | Collagen alpha-2(I) chain                                        | - | + | - |  | 0.049 |
| 72  | Four and a half LIM domains 1                                    | - | + | - |  | 0.029 |
| 73  | KIAA1671                                                         | - | + | - |  | 0.001 |
| 74  | Spleen trypsin inhibitor I                                       | - | + | - |  | 0.001 |
| 75  | Protein tyrosine phosphatase receptor type G                     | - | + | - |  | 0.000 |
| 76  | Ig-like domain-containing protein                                | - | + | - |  | 0     |
| 77  | Uncharacterized protein                                          | - | + | - |  | 0.037 |
| 78  | Tyrosine-protein kinase receptor Tie-1                           | - | + | - |  | 0.000 |
| 79  | Transforming growth factor beta receptor 3                       | - | + | - |  | 0.002 |
| 80  | 14-3-3 protein epsilon                                           | + | + | - |  | 0     |
| 81  | Alpha-1,4 glucan phosphorylase                                   | + | + | - |  | 0.024 |
| 82  | Glycoprotein 2                                                   | - | + | - |  | 0.004 |
| 83  | Tubulin alpha-4A chain                                           | + | + | - |  | 0     |
| 84  | Cell adhesion molecule L1 like                                   | - | + | - |  | 0.008 |
| 85  | Complement factor properdin                                      | - | + | - |  | 0.006 |
| 86  | Uncharacterized protein                                          | - | + | - |  | 0.043 |
| 87  | Ig-like domain-containing protein                                | - | + | - |  | 0.015 |
| 88  | Uncharacterized protein                                          | - | + | - |  | 0     |
| 89  | Cathepsin D                                                      | - | + | - |  | 0.012 |
| 90  | Polyubiquitin-B (Fragment)                                       | + | + | - |  | 0.002 |
| 91  | Histone H3                                                       | + | + | - |  | 0.014 |
| 92  | C-type mannose receptor 2                                        | + | + | - |  | 0.000 |
| 93  | Dickkopf-related protein 3                                       | + | + | - |  | 0.000 |
| 94  | Extracellular matrix protein 1                                   | - | + | - |  | 0.038 |
| 95  | L-lactate dehydrogenase                                          | + | + | - |  | 0.003 |
| 96  | Ig-like domain-containing protein                                | - | + | - |  | 0.005 |
| 97  | Thyroglobulin                                                    | - | + | - |  | 0.013 |
| 98  | Epidermal growth factor receptor                                 | + | + | - |  | 0.031 |
| 99  | Contactin-1                                                      | + | + | - |  | 0.047 |
| 100 | Complement C1s subcomponent                                      | - | + | - |  | 0.001 |
| 101 | Vitamin K-dependent protein Z                                    | - | + | - |  | 0.001 |
| 102 | Uncharacterized protein                                          | - | + | - |  | 0.002 |



|     |                                                              |   |   |   |  |       |
|-----|--------------------------------------------------------------|---|---|---|--|-------|
| 139 | Ig-like domain-containing protein                            | - | + | - |  | 0.008 |
| 140 | Cadherin-1                                                   | - | + | - |  | 0.019 |
| 141 | Retinol-binding protein 4                                    | - | + | - |  | 0.033 |
| 142 | Lysosomal-associated membrane protein 2                      | - | + | - |  | 0.022 |
| 143 | Follistatin-related protein 1                                | + | + | - |  | 0.003 |
| 144 | Annexin A5                                                   | + | + | - |  | 0.001 |
| 145 | Beta-2-microglobulin                                         | - | + | - |  | 0.001 |
| 146 | Acetyl-CoA acetyltransferase 2                               | - | + | - |  | 0     |
| 147 | Biotinidase                                                  | - | + | - |  | 0.015 |
| 148 | Malic enzyme                                                 | - | + | - |  | 0.000 |
| 149 | Ig-like domain-containing protein                            | - | + | - |  | 0     |
| 150 | Laminin subunit beta 1                                       | - | + | - |  | 0     |
| 151 | Calsyntenin-1 (Fragment)                                     | + | + | - |  | 0.008 |
| 152 | Ig-like domain-containing protein                            | - | + | - |  | 0.001 |
| 153 | Platelet-derived growth factor receptor beta                 | - | + | - |  | 0.034 |
| 154 | SPARC                                                        | + | + | - |  | 0.001 |
| 155 | Homogentisate 1,2-dioxygenase                                | + | + | - |  | 0.004 |
| 156 | Sulfhydryl oxidase                                           | - | + | - |  | 0     |
| 157 | Uncharacterized protein                                      | - | + | - |  | 0.011 |
| 158 | Voltage-dependent calcium channel subunit alpha-2/delta-1    | + | + | - |  | 0.003 |
| 159 | Xaa-Pro dipeptidase (Fragment)                               | + | + | - |  | 0.025 |
| 160 | Ceruloplasmin                                                | - | + | - |  | 0.022 |
| 161 | Integrin alpha-2                                             | + | + | - |  | 0.036 |
| 162 | Ig-like domain-containing protein                            | - | + | - |  | 0.002 |
| 163 | Complement C2                                                | - | + | - |  | 0     |
| 164 | 6-phosphogluconate dehydrogenase, decarboxylating (Fragment) | + | + | - |  | 0.037 |
| 165 | Betaine-homocysteine S-methyltransferase 1                   | + | + | - |  | 0.004 |
| 166 | Amine oxidase                                                | - | + | - |  | 0.001 |
| 167 | Nucleobindin-1 (Fragment)                                    | + | + | - |  | 0.017 |
| 168 | Metalloproteinase inhibitor 1                                | - | + | - |  | 0.031 |
| 169 | Phospholipase A1 member A                                    | - | + | - |  | 0.031 |
| 170 | Myosin light polypeptide 6                                   | + | + | - |  | 0.042 |
| 171 | Olfactomedin-like protein 3                                  | + | + | - |  | 0.007 |
| 172 | 3-hydroxyanthranilate 3,4-dioxygenase                        | - | + | - |  | 0.003 |
| 173 | Coagulation factor X                                         | - | + | - |  | 0.010 |
| 174 | Malate dehydrogenase, cytoplasmic                            | + | + | - |  | 0.006 |

|     |                                                                   |   |   |   |  |  |  |  |  |  |  |  |  |  |  |  |  |  |  |  |       |
|-----|-------------------------------------------------------------------|---|---|---|--|--|--|--|--|--|--|--|--|--|--|--|--|--|--|--|-------|
| 175 | Triosephosphate isomerase                                         | - | + | - |  |  |  |  |  |  |  |  |  |  |  |  |  |  |  |  | 0.001 |
| 176 | Thrombospondin-4                                                  | - | + | - |  |  |  |  |  |  |  |  |  |  |  |  |  |  |  |  | 0.006 |
| 177 | Tubulin alpha-1A chain                                            | + | + | - |  |  |  |  |  |  |  |  |  |  |  |  |  |  |  |  | 0.008 |
| 178 | Rho GDP-dissociation inhibitor 1                                  | - | + | - |  |  |  |  |  |  |  |  |  |  |  |  |  |  |  |  | 0.001 |
| 179 | Angiotensin-converting enzyme                                     | - | + | - |  |  |  |  |  |  |  |  |  |  |  |  |  |  |  |  | 0     |
| 180 | Zinc-alpha-2-glycoprotein                                         | - | + | - |  |  |  |  |  |  |  |  |  |  |  |  |  |  |  |  | 0.041 |
| 181 | Insulin-like growth factor II                                     | + | + | - |  |  |  |  |  |  |  |  |  |  |  |  |  |  |  |  | 0.024 |
| 182 | IL6ST nirs variant 3                                              | + | + | - |  |  |  |  |  |  |  |  |  |  |  |  |  |  |  |  | 0.019 |
| 183 | Serpin A3-2                                                       | - | + | - |  |  |  |  |  |  |  |  |  |  |  |  |  |  |  |  | 0.000 |
| 184 | Cadherin-11                                                       | + | + | - |  |  |  |  |  |  |  |  |  |  |  |  |  |  |  |  | 0.005 |
| 185 | VASN protein                                                      | - | + | - |  |  |  |  |  |  |  |  |  |  |  |  |  |  |  |  | 0.027 |
| 186 | Immunoglobulin superfamily containing leucine-rich repeat protein | - | + | - |  |  |  |  |  |  |  |  |  |  |  |  |  |  |  |  | 0.015 |
| 187 | Prolyl endopeptidase FAP                                          | - | + | - |  |  |  |  |  |  |  |  |  |  |  |  |  |  |  |  | 0.000 |
| 188 | Alpha-actinin-4                                                   | + | + | - |  |  |  |  |  |  |  |  |  |  |  |  |  |  |  |  | 0.047 |
| 189 | PCDHGC3 protein                                                   | - | + | - |  |  |  |  |  |  |  |  |  |  |  |  |  |  |  |  | 0.003 |

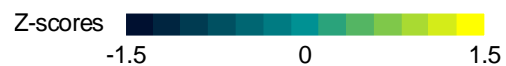



|    |                                                              |    |                                                                                      |       |       |       |
|----|--------------------------------------------------------------|----|--------------------------------------------------------------------------------------|-------|-------|-------|
| 27 | Cadherin-6                                                   | 3  |    | 0.046 | 0.597 | 0.694 |
| 28 | Adenosine kinase (Fragment)                                  | 2  |    | 0.094 | 0.376 | 0.832 |
| 29 | ADP/ATP translocase 1                                        | 1  |    | 0     | 0.022 | 0.077 |
| 30 | Plexin domain-containing protein 2                           | 3  |    | 0.008 | 0.172 | 0.124 |
| 31 | Ferritin (Fragment)                                          | 1  |    | 0.008 | 0.813 | 0.138 |
| 32 | Proteoglycan 4                                               | 3  |    | 0.064 | 0.091 | 0.047 |
| 33 | 14-3-3 protein epsilon                                       | 4  |    | 0.001 | 0.223 | 0.05  |
| 34 | Alpha-1,4 glucan phosphorylase                               | 3  |    | 0.163 | 0.847 | 0.262 |
| 35 | Tubulin alpha-4A chain                                       | 12 |    | 0     | 0.129 | 0.651 |
| 36 | Polyubiquitin-B (Fragment)                                   | 2  |    | 0.015 | 0.275 | 0.484 |
| 37 | Histone H3                                                   | 1  |    | 0.019 | 0.271 | 0.191 |
| 38 | C-type mannose receptor 2                                    | 3  |    | 0.002 | 0.882 | 0.269 |
| 39 | Dickkopf-related protein 3                                   | 1  |    | 0.005 | 0.720 | 0.36  |
| 40 | L-lactate dehydrogenase                                      | 11 |    | 0.003 | 0.208 | 0.286 |
| 41 | Epidermal growth factor receptor                             | 1  |   | 0.055 | 0.504 | 0.189 |
| 42 | Contactin-1                                                  | 8  |  | 0.019 | 0.713 | 0.701 |
| 43 | Protein kinase C-binding protein NELL2 (Fragment)            | 2  |  | 0.010 | 0.847 | 0.418 |
| 44 | Histone H2B                                                  | 4  |  | 0.023 | 0.119 | 0.953 |
| 45 | Alpha-actinin-1                                              | 8  |  | 0.285 | 0.007 | 0.939 |
| 46 | Neural cell adhesion molecule 1                              | 4  |  | 0.006 | 0.282 | 0.292 |
| 47 | Dextrin                                                      | 2  |  | 0.001 | 0.155 | 0.546 |
| 48 | Cadherin-13                                                  | 3  |  | 0.057 | 0.478 | 0.029 |
| 49 | EGF-containing fibulin-like extracellular matrix protein 2   | 2  |  | 0.026 | 0.703 | 0.860 |
| 50 | Rab GDP dissociation inhibitor beta                          | 6  |  | 0.004 | 0.749 | 0.234 |
| 51 | Follistatin-related protein 1                                | 4  |  | 0.031 | 0.324 | 0.836 |
| 52 | Annexin A5                                                   | 2  |  | 0     | 0.617 | 0.878 |
| 53 | Calsyntenin-1 (Fragment)                                     | 1  |  | 0.01  | 0.117 | 0.962 |
| 54 | SPARC                                                        | 13 |  | 0.001 | 0.012 | 0.019 |
| 55 | Homogentisate 1,2-dioxygenase                                | 5  |  | 0.024 | 0.433 | 0.384 |
| 56 | Voltage-dependent calcium channel subunit alpha-2/delta-1    | 10 |  | 0.008 | 0.335 | 0.828 |
| 57 | Xaa-Pro dipeptidase (Fragment)                               | 1  |  | 0.010 | 0.439 | 0.180 |
| 58 | Integrin alpha-2                                             | 1  |  | 0.023 | 0.258 | 0.852 |
| 59 | 6-phosphogluconate dehydrogenase, decarboxylating (Fragment) | 1  |  | 0.124 | 0.121 | 0.242 |

|    |                                             |    |  |       |       |       |
|----|---------------------------------------------|----|--|-------|-------|-------|
| 60 | Betaine--homocysteine S-methyltransferase 1 | 3  |  | 0.089 | 0.095 | 0.046 |
| 61 | Nucleobindin-1 (Fragment)                   | 1  |  | 0.003 | 0.010 | 0.247 |
| 62 | Myosin light polypeptide 6                  | 3  |  | 0.293 | 0.004 | 0.207 |
| 63 | Olfactomedin-like protein 3                 | 1  |  | 0.003 | 0.668 | 0.907 |
| 64 | Malate dehydrogenase, cytoplasmic           | 2  |  | 0.088 | 0.068 | 0.066 |
| 65 | Tubulin alpha-1A chain                      | 12 |  | 0.024 | 0.575 | 0.899 |
| 66 | Insulin-like growth factor II               | 2  |  | 0.958 | 0.070 | 0.158 |
| 67 | IL6ST nirs variant 3                        | 1  |  | 0.294 | 0.098 | 0.401 |
| 68 | Cadherin-11                                 | 2  |  | 0.456 | 0.848 | 0.016 |
| 69 | Alpha-actinin-4                             | 8  |  | 0.143 | 0.181 | 0.154 |

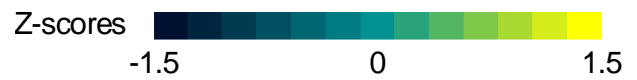



**Supplementary Figure 8.** Heatmap depicting the human proteins significantly regulated in abundance in the different culture conditions: i) EVT-mono, ii) EC-mono, iii) CO, and iv) TRI

| No. | Description from fasta                              | EVT-mono  | EC-mono   | CO        | TRI       |
|-----|-----------------------------------------------------|-----------|-----------|-----------|-----------|
| 1   | Alpha-1,4 glucan phosphorylase                      | Yellow    | Dark Blue | Yellow    | Dark Blue |
| 2   | Phosphoglucomutase-1                                | Yellow    | Dark Blue | Dark Blue | Dark Blue |
| 3   | Proteoglycan 4                                      | Green     | Green     | Dark Blue | Green     |
| 4   | Histone H4                                          | Yellow    | Dark Blue | Dark Blue | Dark Blue |
| 5   | Neogenin                                            | Yellow    | Dark Blue | Dark Blue | Dark Blue |
| 6   | Protein disulfide-isomerase                         | Yellow    | Dark Blue | Dark Blue | Dark Blue |
| 7   | Interleukin-1 receptor accessory protein (Fragment) | Green     | Dark Blue | Dark Blue | Dark Blue |
| 8   | Lactoylglutathione lyase                            | Yellow    | Dark Blue | Dark Blue | Yellow    |
| 9   | Plastin-2                                           | Yellow    | Dark Blue | Dark Blue | Dark Blue |
| 10  | Vasodilator-stimulated phosphoprotein               | Yellow    | Dark Blue | Dark Blue | Dark Blue |
| 11  | Cadherin-6                                          | Yellow    | Dark Blue | Dark Blue | Dark Blue |
| 12  | Adenosine kinase (Fragment)                         | Yellow    | Dark Blue | Dark Blue | Dark Blue |
| 13  | ADP/ATP translocase 1                               | Yellow    | Dark Blue | Dark Blue | Dark Blue |
| 14  | Plexin domain-containing protein 2                  | Yellow    | Dark Blue | Dark Blue | Dark Blue |
| 15  | Ferritin (Fragment)                                 | Yellow    | Dark Blue | Dark Blue | Dark Blue |
| 16  | 14-3-3 protein epsilon                              | Yellow    | Dark Blue | Dark Blue | Dark Blue |
| 17  | Tubulin alpha-4A chain                              | Yellow    | Dark Blue | Dark Blue | Dark Blue |
| 18  | Fructose-bisphosphate aldolase                      | Dark Blue | Dark Blue | Dark Blue | Dark Blue |
| 19  | Translationally-controlled tumor protein            | Dark Blue | Dark Blue | Dark Blue | Dark Blue |
| 20  | Tubulin beta chain                                  | Dark Blue | Dark Blue | Dark Blue | Dark Blue |
| 21  | Collagen alpha-2(I) chain                           | Dark Blue | Dark Blue | Dark Blue | Dark Blue |
| 22  | Receptor-type tyrosine-protein phosphatase S        | Dark Blue | Dark Blue | Dark Blue | Dark Blue |
| 23  | Collagen alpha-1(IV) chain (Fragment)               | Dark Blue | Dark Blue | Dark Blue | Dark Blue |
| 24  | Serine protease HTRA1                               | Dark Blue | Dark Blue | Dark Blue | Dark Blue |
| 25  | Proteasome subunit alpha type-2 (Fragment)          | Dark Blue | Dark Blue | Dark Blue | Dark Blue |
| 26  | Cell adhesion molecule 1                            | Dark Blue | Dark Blue | Dark Blue | Dark Blue |
| 27  | Peroxiredoxin-1 (Fragment)                          | Dark Blue | Dark Blue | Dark Blue | Dark Blue |
| 28  | Proteasome subunit beta type-2                      | Dark Blue | Dark Blue | Dark Blue | Dark Blue |
| 29  | Histone H2A                                         | Dark Blue | Dark Blue | Dark Blue | Dark Blue |
| 30  | Thioredoxin reductase 1, cytoplasmic                | Dark Blue | Dark Blue | Dark Blue | Dark Blue |
| 31  | Collagen alpha-1(VI) chain                          | Dark Blue | Dark Blue | Dark Blue | Dark Blue |
| 32  | Neurobeachin                                        | Yellow    | Dark Blue | Dark Blue | Dark Blue |
| 33  | Carboxylic ester hydrolase                          | Dark Blue | Dark Blue | Dark Blue | Dark Blue |
| 34  | Isocitrate dehydrogenase [NADP] cytoplasmic         | Dark Blue | Dark Blue | Dark Blue | Dark Blue |
| 35  | Tropomyosin alpha-4 chain                           | Dark Blue | Dark Blue | Dark Blue | Dark Blue |
| 36  | Alpha-actinin-1                                     | Dark Blue | Dark Blue | Dark Blue | Dark Blue |
| 37  | Neural cell adhesion molecule 1                     | Dark Blue | Dark Blue | Dark Blue | Dark Blue |
| 38  | Annexin A5                                          | Dark Blue | Dark Blue | Dark Blue | Dark Blue |



**Supplementary Figure 9.** List of proteins showing significant increase or decrease between EVT monoculture (EVT-mono) and coculture of EVTs and ECs (CO) (two-sided t-test).

| Uniquely expressed proteins in CO against EVT-mono |                                                       |              |          |   |   |   |    |   |   |   |         |                                                   |      |
|----------------------------------------------------|-------------------------------------------------------|--------------|----------|---|---|---|----|---|---|---|---------|---------------------------------------------------|------|
| No.                                                | Protein name                                          | Peptide Hits | EVT-mono |   |   |   | CO |   |   |   | P value | Known role in implantation/placental development? | Ref. |
|                                                    |                                                       |              | 1        | 2 | 3 | 4 | 1  | 2 | 3 | 4 |         |                                                   |      |
| 1                                                  | Neural cell adhesion molecule 1                       | 4            |          |   |   |   |    |   |   |   | 0.000   | Yes                                               | S14  |
| 2                                                  | Annexin A5                                            | 2            |          |   |   |   |    |   |   |   | 0.021   | Yes                                               | S15  |
| 3                                                  | Protein S100-A9                                       | 3            |          |   |   |   |    |   |   |   | 0.100   | Yes                                               | S16  |
| 4                                                  | Actin, cytoplasmic 1                                  | 27           |          |   |   |   |    |   |   |   | 0.286   | Yes                                               | S17  |
| 5                                                  | Alpha-2-macroglobulin                                 | 11           |          |   |   |   |    |   |   |   | 0.312   | Yes                                               | S18  |
| 6                                                  | Golgi-associated plant pathogenesis-related protein 1 | 1            |          |   |   |   |    |   |   |   | 0.352   | No                                                |      |
| 7                                                  | Thioredoxin                                           | 3            |          |   |   |   |    |   |   |   | 0.785   | Yes                                               | S19  |
| Up-regulated proteins in CO against EVT-mono       |                                                       |              |          |   |   |   |    |   |   |   |         |                                                   |      |
| No.                                                | Protein name                                          | Peptide Hits | EVT-mono |   |   |   | CO |   |   |   | P value | Known role in implantation/placental development? | Ref. |
|                                                    |                                                       |              | 1        | 2 | 3 | 4 | 1  | 2 | 3 | 4 |         |                                                   |      |
| 1                                                  | Annexin A5                                            | 2            |          |   |   |   |    |   |   |   | 0       | Yes                                               | S15  |
| 2                                                  | Calsyntenin-1 (Fragment)                              | 1            |          |   |   |   |    |   |   |   | 0.01    | No                                                |      |
| 3                                                  | Follistatin-related protein 1                         | 4            |          |   |   |   |    |   |   |   | 0.031   | Yes                                               | S20  |
| 4                                                  | Integrin alpha-2                                      | 1            |          |   |   |   |    |   |   |   | 0.023   | Yes                                               | S21  |
| 5                                                  | Neural cell adhesion molecule 1                       | 4            |          |   |   |   |    |   |   |   | 0.006   | Yes                                               | S14  |
| 6                                                  | Triosephosphate isomerase                             | 7            |          |   |   |   |    |   |   |   | 0.002   | No                                                |      |
| 7                                                  | SPARC                                                 | 13           |          |   |   |   |    |   |   |   | 0.001   | Yes                                               | S22  |
| 8                                                  | Protein kinase C-binding protein NELL2 (Fragment)     | 2            |          |   |   |   |    |   |   |   | 0.010   | No                                                |      |
| 9                                                  | Histone H2B                                           | 4            |          |   |   |   |    |   |   |   | 0.023   | Yes                                               | S23  |
| 10                                                 | Moesin                                                | 4            |          |   |   |   |    |   |   |   | 0.003   | Yes                                               | S24  |
| 11                                                 | C-type mannose receptor 2                             | 3            |          |   |   |   |    |   |   |   | 0.002   | Yes                                               | S25  |
| 12                                                 | Dextrin                                               | 2            |          |   |   |   |    |   |   |   | 0.001   | No                                                |      |
| 13                                                 | Histone H3                                            | 1            |          |   |   |   |    |   |   |   | 0.019   | Yes                                               | S26  |
| 14                                                 | Dickkopf-related protein 3                            | 1            |          |   |   |   |    |   |   |   | 0.005   | Yes                                               | S27  |
| 15                                                 | Thioredoxin reductase 1, cytoplasmic                  | 3            |          |   |   |   |    |   |   |   | 0.027   | Yes                                               | S28  |
| 17                                                 | Rab GDP dissociation inhibitor beta                   | 6            |          |   |   |   |    |   |   |   | 0.004   | No                                                |      |

|    |                                                            |    |  |  |  |  |  |  |  |  |       |     |     |
|----|------------------------------------------------------------|----|--|--|--|--|--|--|--|--|-------|-----|-----|
| 22 | Voltage-dependent calcium channel subunit alpha-2/delta-1  | 10 |  |  |  |  |  |  |  |  | 0.008 | No  |     |
| 24 | Polyubiquitin-B (Fragment)                                 | 2  |  |  |  |  |  |  |  |  | 0.015 | Yes | S29 |
| 25 | Isocitrate dehydrogenase [NADP] cytoplasmic                | 4  |  |  |  |  |  |  |  |  | 0.015 | Yes | S30 |
| 26 | Proteasome subunit alpha type                              | 2  |  |  |  |  |  |  |  |  | 0.005 | No  |     |
| 27 | L-lactate dehydrogenase                                    | 11 |  |  |  |  |  |  |  |  | 0.003 | Yes | S31 |
| 28 | Collagen alpha-1(IX) chain                                 | 2  |  |  |  |  |  |  |  |  | 0.004 | Yes | S32 |
| 29 | Tubulin alpha-1A chain                                     | 12 |  |  |  |  |  |  |  |  | 0.024 | Yes | S33 |
| 30 | Contactin-1                                                | 8  |  |  |  |  |  |  |  |  | 0.019 | Yes | S34 |
| 31 | DnaJ homolog subfamily C member 13                         | 1  |  |  |  |  |  |  |  |  | 0.046 | No  |     |
| 15 | Olfactomedin-like protein 3                                | 1  |  |  |  |  |  |  |  |  | 0.003 | No  |     |
| 16 | EGF-containing fibulin-like extracellular matrix protein 2 | 11 |  |  |  |  |  |  |  |  | 0.026 | No  |     |
| 17 | Proteasome subunit alpha type-2 (Fragment)                 | 1  |  |  |  |  |  |  |  |  | 0.043 | No  |     |
| 18 | Homogentisate 1,2-dioxygenase                              | 5  |  |  |  |  |  |  |  |  | 0.024 | No  |     |
| 19 | Nucleobindin-1 (Fragment)                                  | 1  |  |  |  |  |  |  |  |  | 0.003 | No  |     |
| 20 | Carboxylic ester hydrolase                                 | 1  |  |  |  |  |  |  |  |  | 0.017 | No  |     |
| 21 | Xaa-Pro dipeptidase (Fragment)                             | 1  |  |  |  |  |  |  |  |  | 0.010 | No  |     |

| Down-regulated proteins in CO against EVT-mono |                                                                      |              |          |   |   |   |    |   |   |   |         |                                                    |      |
|------------------------------------------------|----------------------------------------------------------------------|--------------|----------|---|---|---|----|---|---|---|---------|----------------------------------------------------|------|
| No.                                            | Protein name                                                         | Peptide Hits | EVT-mono |   |   |   | CO |   |   |   | P value | Known role in implantation /placental development? | Ref. |
|                                                |                                                                      |              | 1        | 2 | 3 | 4 | 1  | 2 | 3 | 4 |         |                                                    |      |
| 1                                              | Cadherin-6                                                           | 3            |          |   |   |   |    |   |   |   | 0.046   | Yes                                                | S35  |
| 2                                              | Metalloproteinase inhibitor 1                                        | 5            |          |   |   |   |    |   |   |   | 0.019   | Yes                                                | S36  |
| 3                                              | Plexin domain-containing protein 2                                   | 3            |          |   |   |   |    |   |   |   | 0.008   | No                                                 |      |
| 4                                              | Ferritin (Fragment)                                                  | 1            |          |   |   |   |    |   |   |   | 0.008   | Yes                                                | S37  |
| 5                                              | Basement membrane-specific heparan sulfate proteoglycan core protein | 16           |          |   |   |   |    |   |   |   | 0.047   | Yes                                                | S38  |
| 6                                              | 14-3-3 protein epsilon                                               | 4            |          |   |   |   |    |   |   |   | 0.001   | Yes                                                | S39  |
| 7                                              | Histone H4                                                           | 3            |          |   |   |   |    |   |   |   | 0.009   | Yes                                                | S40  |
| 8                                              | Vasodilator-stimulated phosphoprotein                                | 2            |          |   |   |   |    |   |   |   | 0.041   | Yes                                                | S41  |
| 9                                              | Protein disulfide-isomerase                                          | 5            |          |   |   |   |    |   |   |   | 0.001   | Yes                                                | S42  |
| 10                                             | Neogenin                                                             | 4            |          |   |   |   |    |   |   |   | 0       | Yes                                                | S43  |
| 11                                             | Lactoylglutathione lyase                                             | 1            |          |   |   |   |    |   |   |   | 0.001   | Yes                                                | S44  |

|    |                                                     |    |  |  |  |  |  |  |       |     |     |
|----|-----------------------------------------------------|----|--|--|--|--|--|--|-------|-----|-----|
| 12 | ADP/ATP translocase 1                               | 1  |  |  |  |  |  |  | 0     | No  |     |
| 13 | Interleukin-1 receptor accessory protein (Fragment) | 3  |  |  |  |  |  |  | 0.011 | Yes | S45 |
| 14 | Plastin-2                                           | 4  |  |  |  |  |  |  | 0.001 | Yes | S46 |
| 15 | Tubulin alpha-4A chain                              | 12 |  |  |  |  |  |  | 0     | No  |     |

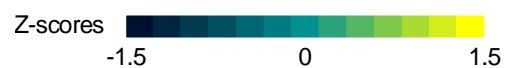

**Supplementary Figure 10.** List of proteins showing significant increase or decrease between EC monoculture (EC-mono) and coculture of EVT and EC (CO) (two-sided t-test).

| Up-regulated proteins in CO against EC-mono |                                                       |              |             |             |             |             |        |             |             |             |         |                                                   |      |
|---------------------------------------------|-------------------------------------------------------|--------------|-------------|-------------|-------------|-------------|--------|-------------|-------------|-------------|---------|---------------------------------------------------|------|
| No.                                         | Protein name                                          | Peptide Hits | EC-mono     |             |             |             | CO     |             |             |             | P value | Known role in implantation/placental development? | Ref. |
|                                             |                                                       |              | 1           | 2           | 3           | 4           | 1      | 2           | 3           | 4           |         |                                                   |      |
| 1                                           | Serine protease HTRA1                                 | 2            | Dark Blue   | Dark Blue   | Dark Blue   | Dark Blue   | Yellow | Yellow      | Yellow      | Yellow      | 0.000   | Yes                                               | S47  |
| 2                                           | Peroxiredoxin-1 (Fragment)                            | 3            | Dark Blue   | Dark Blue   | Dark Blue   | Light Green | Yellow | Light Green | Light Green | Light Green | 0.012   | Yes                                               | S48  |
| 3                                           | Receptor-type tyrosine-protein phosphatase S          | 1            | Dark Blue   | Dark Blue   | Dark Blue   | Dark Blue   | Yellow | Light Green | Light Green | Light Green | 0       | Yes                                               | S49  |
| 4                                           | Translationally-controlled tumor protein              | 2            | Dark Blue   | Dark Blue   | Dark Blue   | Dark Blue   | Yellow | Light Green | Light Green | Light Green | 0.001   | Yes                                               | S50  |
| 5                                           | Collagen alpha-1(IV) chain (Fragment)                 | 3            | Dark Blue   | Dark Blue   | Dark Blue   | Dark Blue   | Yellow | Light Green | Light Green | Light Green | 0.001   | Yes                                               | S51  |
| 6                                           | Tubulin beta chain                                    | 13           | Dark Blue   | Dark Blue   | Dark Blue   | Dark Blue   | Yellow | Light Green | Light Green | Light Green | 0.000   | Yes                                               | S52  |
| 7                                           | Collagen alpha-2(I) chain                             | 10           | Dark Blue   | Dark Blue   | Dark Blue   | Dark Blue   | Yellow | Light Green | Light Green | Light Green | 0.002   | Yes                                               | S53  |
| 8                                           | Golgi-associated plant pathogenesis-related protein 1 | 1            | Dark Blue   | Dark Blue   | Dark Blue   | Dark Blue   | Yellow | Light Green | Light Green | Light Green | 0.025   | No                                                |      |
| 9                                           | Tropomyosin alpha-4 chain                             | 3            | Light Green | Light Green | Dark Blue   | Dark Blue   | Yellow | Light Green | Light Green | Light Green | 0.015   | Yes                                               | S54  |
| 10                                          | Cell adhesion molecule 1                              | 1            | Dark Blue   | Dark Blue   | Dark Blue   | Dark Blue   | Yellow | Light Green | Light Green | Light Green | 0.009   | Yes                                               | S55  |
| 11                                          | Fructose-bisphosphate aldolase                        | 5            | Dark Blue   | Dark Blue   | Dark Blue   | Dark Blue   | Yellow | Light Green | Light Green | Light Green | 0.000   | Yes                                               | S56  |
| 12                                          | Triosephosphate isomerase                             | 7            | Light Green | Light Green | Dark Blue   | Dark Blue   | Yellow | Light Green | Light Green | Light Green | 0.048   | No                                                |      |
| 13                                          | Antithrombin-III                                      | 11           | Dark Blue   | Dark Blue   | Dark Blue   | Dark Blue   | Yellow | Light Green | Light Green | Light Green | 0.015   | Yes                                               | S57  |
| 14                                          | SPARC                                                 | 13           | Light Green | Dark Blue   | Dark Blue   | Dark Blue   | Yellow | Light Green | Light Green | Light Green | 0.012   | Yes                                               | S22  |
| 15                                          | ADP/ATP translocase 1                                 | 1            | Light Green | Light Green | Dark Blue   | Dark Blue   | Yellow | Light Green | Light Green | Light Green | 0.022   | No                                                |      |
| 16                                          | Thioredoxin reductase 1, cytoplasmic                  | 1            | Light Green | Dark Blue   | Dark Blue   | Dark Blue   | Yellow | Light Green | Light Green | Light Green | 0.002   | Yes                                               | S28  |
| 17                                          | Reticulocalbin-3                                      | 5            | Light Green | Light Green | Dark Blue   | Dark Blue   | Yellow | Light Green | Light Green | Light Green | 0.028   |                                                   | S58  |
| 18                                          | Phosphoglucomutase-1                                  | 2            | Dark Blue   | Dark Blue   | Light Green | Dark Blue   | Yellow | Light Green | Light Green | Light Green | 0.030   | Yes                                               | S59  |
| 19                                          | Isocitrate dehydrogenase [NADP] cytoplasmic           | 4            | Light Green | Dark Blue   | Dark Blue   | Dark Blue   | Yellow | Light Green | Light Green | Light Green | 0.004   | Yes                                               | S30  |
| 20                                          | Nidogen-1                                             | 7            | Dark Blue   | Dark Blue   | Dark Blue   | Dark Blue   | Yellow | Light Green | Light Green | Light Green | 0.003   | Yes                                               | S60  |
| 21                                          | Biglycan                                              | 3            | Dark Blue   | Dark Blue   | Dark Blue   | Dark Blue   | Yellow | Light Green | Light Green | Light Green | 0.013   | Yes                                               | S61  |
| 22                                          | Proteasome subunit alpha type                         | 2            | Dark Blue   | Light Green | Dark Blue   | Dark Blue   | Yellow | Light Green | Light Green | Light Green | 0.015   | No                                                |      |
| 23                                          | Collagen alpha-1(VI) chain                            | 20           | Light Green | Dark Blue   | Dark Blue   | Dark Blue   | Yellow | Light Green | Light Green | Light Green | 0.027   | Yes                                               | S51  |
| 24                                          | Proteasome subunit alpha type-2 (Fragment)            | 1            | Light Green | Dark Blue   | Dark Blue   | Dark Blue   | Yellow | Light Green | Light Green | Light Green | 0.019   | No                                                |      |
| 25                                          | Alpha-actinin-1                                       | 8            | Dark Blue   | Dark Blue   | Dark Blue   | Dark Blue   | Yellow | Light Green | Light Green | Light Green | 0.007   | No                                                |      |
| 26                                          | Carboxylic ester hydrolase                            | 1            | Light Green | Dark Blue   | Dark Blue   | Dark Blue   | Yellow | Light Green | Light Green | Light Green | 0.006   | No                                                |      |
| 27                                          | GTP-binding nuclear protein Ran                       | 2            | Light Green | Dark Blue   | Dark Blue   | Dark Blue   | Yellow | Light Green | Light Green | Light Green | 0.025   | No                                                |      |

|    |                           |   |                                                                                    |       |    |
|----|---------------------------|---|------------------------------------------------------------------------------------|-------|----|
| 28 | Nucleobindin-1 (Fragment) | 1 |  | 0.010 | No |
|----|---------------------------|---|------------------------------------------------------------------------------------|-------|----|

**Down-regulated proteins in CO against EC-mono**

| No. | Protein name               | Peptide Hits | EC-mono                                                                           |                                                                                   |                                                                                   |                                                                                   | CO                                                                                |                                                                                   |                                                                                    |                                                                                     | P value | Known role in implantation/placental development? | Ref. |
|-----|----------------------------|--------------|-----------------------------------------------------------------------------------|-----------------------------------------------------------------------------------|-----------------------------------------------------------------------------------|-----------------------------------------------------------------------------------|-----------------------------------------------------------------------------------|-----------------------------------------------------------------------------------|------------------------------------------------------------------------------------|-------------------------------------------------------------------------------------|---------|---------------------------------------------------|------|
|     |                            |              | 1                                                                                 | 2                                                                                 | 3                                                                                 | 4                                                                                 | 1                                                                                 | 2                                                                                 | 3                                                                                  | 4                                                                                   |         |                                                   |      |
| 1   | Myosin light polypeptide 6 | 3            |  |  |  |  |  |  |  |  | 0.004   | Yes                                               | S39  |

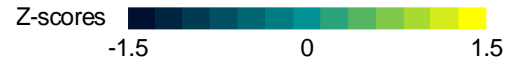

**Supplementary Figure 11.** Fourteen significantly upregulated endothelial proteins in the coculture configuration of the implantation-on-a-chip.

| Endothelial Proteins |                                                       |              |           |             |           |           |             |             |             |             |
|----------------------|-------------------------------------------------------|--------------|-----------|-------------|-----------|-----------|-------------|-------------|-------------|-------------|
| No.                  | Protein Name                                          | Peptide Hits | EC-Mono   |             |           |           | Co          |             |             |             |
|                      |                                                       |              | 1         | 2           | 3         | 4         | 1           | 2           | 3           | 4           |
| 1                    | Thrombospondin-4                                      | 5            | Grey      | Dark Blue   | Grey      | Dark Blue | Light Green | Light Green | Light Green | Light Green |
| 2                    | Pantetheinase                                         | 3            | Dark Blue | Dark Blue   | Dark Blue | Dark Blue | Yellow      | Light Green | Light Green | Light Green |
| 3                    | Coagulation factor X                                  | 4            | Dark Blue | Grey        | Grey      | Dark Blue | Light Green | Light Green | Light Green | Light Green |
| 4                    | Apolipoprotein B-100                                  | 6            | Dark Blue | Dark Blue   | Dark Blue | Dark Blue | Light Green | Light Green | Light Green | Light Green |
| 5                    | Insulin-like growth factor-binding protein 2          | 10           | Dark Blue | Light Green | Grey      | Grey      | Light Green | Light Green | Light Green | Light Green |
| 6                    | Rab GDP dissociation inhibitor alpha                  | 12           | Dark Blue | Dark Blue   | Dark Blue | Dark Blue | Light Green | Light Green | Light Green | Light Green |
| 7                    | Parkinson disease protein 7                           | 4            | Dark Blue | Dark Blue   | Dark Blue | Dark Blue | Light Green | Yellow      | Light Green | Light Green |
| 8                    | Collagen alpha-1(VI) chain                            | 37           | Dark Blue | Dark Blue   | Dark Blue | Dark Blue | Light Green | Light Green | Light Green | Light Green |
| 9                    | Apolipoprotein C-III                                  | 1            | Grey      | Light Green | Grey      | Grey      | Light Green | Light Green | Light Green | Light Green |
| 10                   | Collagen alpha-1(III) chain                           | 19           | Grey      | Light Green | Dark Blue | Dark Blue | Light Green | Light Green | Light Green | Light Green |
| 11                   | Collagen alpha-3(VI) chain                            | 4            | Dark Blue | Dark Blue   | Dark Blue | Dark Blue | Light Green | Dark Blue   | Light Green | Light Green |
| 12                   | Prolow-density lipoprotein receptor-related protein 1 | 52           | Grey      | Grey        | Grey      | Dark Blue | Light Green | Light Green | Light Green | Light Green |
| 13                   | Retinol-binding protein                               | 5            | Grey      | Dark Blue   | Grey      | Grey      | Light Green | Light Green | Light Green | Light Green |
| 14                   | Reticulocalbin-3                                      | 8            | Grey      | Grey        | Grey      | Dark Blue | Light Green | Light Green | Light Green | Light Green |



**Supplementary Figure 12.** Twelve significantly upregulated EVT proteins in coculture configuration of the implantation-on-a-chip.

| EVT Proteins |                                              |              |            |            |            |            |             |             |             |             |
|--------------|----------------------------------------------|--------------|------------|------------|------------|------------|-------------|-------------|-------------|-------------|
| No.          | Protein Name                                 | Peptide Hits | EVT-Mono   |            |            |            | Co          |             |             |             |
|              |                                              |              | 1          | 2          | 3          | 4          | 1           | 2           | 3           | 4           |
| 1            | Thrombospondin-4                             | 5            | Light Blue | Dark Blue  | Light Blue | Dark Blue  | Light Green | Light Green | Light Green | Light Green |
| 2            | Pantetheinase                                | 3            | Dark Blue  | Dark Blue  | Dark Blue  | Dark Blue  | Light Green | Light Green | Light Green | Light Green |
| 3            | Coagulation factor X                         | 4            | Dark Blue  | Light Blue | Light Blue | Dark Blue  | Light Green | Light Green | Light Green | Light Green |
| 4            | Collagen alpha-1(II) chain                   | 4            | Dark Blue  | Dark Blue  | Dark Blue  | Dark Blue  | Light Green | Light Green | Light Green | Light Green |
| 5            | Apolipoprotein B-100                         | 6            | Dark Blue  | Dark Blue  | Light Blue | Light Blue | Light Green | Light Green | Light Green | Light Green |
| 6            | von Willebrand factor                        | 122          | Dark Blue  | Dark Blue  | Dark Blue  | Dark Blue  | Light Green | Light Green | Light Green | Light Green |
| 7            | Thrombospondin-1                             | 13           | Dark Blue  | Dark Blue  | Dark Blue  | Dark Blue  | Light Green | Light Green | Light Green | Light Green |
| 8            | Insulin-like growth factor-binding protein 2 | 10           | Dark Blue  | Dark Blue  | Dark Blue  | Dark Blue  | Light Green | Light Green | Light Green | Light Green |
| 9            | Contactin-1                                  | 7            | Light Blue | Dark Blue  | Light Blue | Light Blue | Light Green | Light Green | Light Green | Light Green |
| 10           | Coactosin-like protein                       | 5            | Light Blue | Dark Blue  | Dark Blue  | Dark Blue  | Light Green | Light Green | Light Green | Light Green |
| 11           | Parkinson disease protein 7                  | 4            | Dark Blue  | Dark Blue  | Dark Blue  | Light Blue | Light Green | Light Green | Light Green | Light Green |
| 12           | Dipeptidyl peptidase 2                       | 9            | Light Blue | Light Blue | Light Blue | Dark Blue  | Light Green | Light Green | Light Green | Light Green |

**Supplementary Figure 13.** Viability and marker expression of DSCs and additional cell types in the implantation-on-a-chip. (a) Quantification of the viability of DSCs and additional cell types used in the implantation-on-a-chip after 6 days of device culture. Data were obtained from LIVE/DEAD viability assay using Calcein-AM and ethidium homodimer-1 (EthD-1). Data represent mean  $\pm$  SD from three independent devices (n=3). One-way ANOVA with Tukey's multiple comparison test. (b) Immunofluorescence staining of cell-type-specific marker expression by DSCs and NHLFs used in the implantation-on-a-chip after 6 days of device culture. The representative images are from three independent experiments. Scale bars, 100  $\mu$ m.

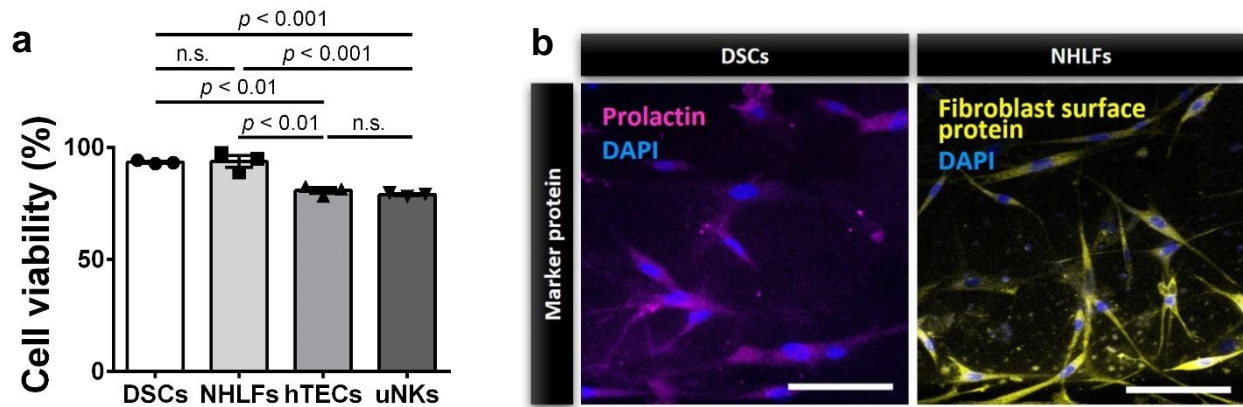

**Supplementary Table 1.** Cells and authentication methods.

| <b>Cells</b>                                              | <b>Vendor</b>   | <b>Catalog number</b> | <b>Authentication method</b>                                                                                                                                                                                              |
|-----------------------------------------------------------|-----------------|-----------------------|---------------------------------------------------------------------------------------------------------------------------------------------------------------------------------------------------------------------------|
| HTR-8/SVneo                                               | ATCC            | CRL-3271              | STR profiling in July 2016;showed a distinctly human profile (TH01: 6, 9,3;D5S818: 12;D13S317: 9, 12;D7S820: 12;D16S539: 13;CSF1PO: 12;Amelogenin: X;vWA: 13, 18;TPOX:8).                                                 |
| Human endometrial microvascular endothelial cells (HEMEC) | ScienCell       | 7010                  | Phenotypic and immunofluorescent characterization by company in March 2015; correct morphology and von Willebrand Factor VIII expression. HEMECs were tested negative for HIV, HBV, HCV, mycoplasma, bacteria, and fungi. |
| Human lung microvascular endothelial cells (HMVEC-L)      | Lonza           | CC-2527               | Phenotypic and immunofluorescent characterization by company using von Willebrand Factor VIII.                                                                                                                            |
| Human brain microvascular endothelial cells (HBMVEC)      | AngioPorte-omie | CAP-0002              | Immunofluorescent characterization by company with antibodies specific to von Willebrand Factor VIII, Di-I-Acetylated-low density lipoprotein, and PECAM1.                                                                |
| Normal human lung fibroblasts                             | Lonza           | CC-2512               | Immunofluorescent characterization by company with negative expression for Factor VIII, Cytokeratin 18, and Cytokeratin 19.                                                                                               |
| Human tracheal epithelial cells                           | PromoCell       | C-12644               | Flow cytometric characterization by company using positive expression of Cytokeratin.                                                                                                                                     |

**Supplementary Table 2.** Primary and secondary antibodies for immunofluorescence staining.

| <b>Primary antibody<br/>[Clone]</b>     | <b>Species</b> | <b>Dilution</b> | <b>Product<br/>information</b>         | <b>Secondary antibody</b>                            | <b>Dilution</b> |
|-----------------------------------------|----------------|-----------------|----------------------------------------|------------------------------------------------------|-----------------|
| CD31<br>[P2B1]                          | Mouse          | 1:200           | Abcam<br>#ab24590                      | Goat Anti-Mouse IgG (H+L)<br>(Alexa Fluor® Plus 555) | 1:200           |
| VE-Cadherin<br>[D87F2]                  | Rabbit         | 1:200           | Cell Signaling<br>#2500                | Goat Anti-Rabbit IgG H&L<br>(Alexa Fluor® 647)       | 1:200           |
| Cleaved Caspase-3<br>[Asp175]           | Rabbit         | 1:200           | Cell Signaling<br>#9661                | Goat Anti-Mouse IgG H&L<br>(Alexa Fluor® 647)        | 1:200           |
| Ki67<br>[37C7-12]                       | Mouse          | 1:200           | Abcam<br>#ab245113                     | Goat Anti-Mouse IgG H&L<br>(Alexa Fluor® 647)        | 1:200           |
| Cytokeratin<br>[EPR17078]               | Rabbit         | 1:100           | Abcam<br>#ab181598                     | Goat Anti-Rabbit IgG H&L<br>(Alexa Fluor® 647)       | 1:200           |
| HLA G<br>[MEM-G/9]                      | Mouse          | 1:100           | BioRad<br>#MCA2044                     | Goat Anti-Mouse IgG H&L<br>(Alexa Fluor® 647)        | 1:100           |
| VCAM-1/CD106<br>[6G9]                   | Mouse          | 1:200           | Novus Biolog-<br>icals #NBP1-<br>47491 | Goat Anti-Mouse IgG H&L<br>(Alexa Fluor® 647)        | 1:200           |
| Complement C4<br>[JM88-13]              | Rabbit         | 1:200           | Thermo<br>Fisher<br>#MA5-32856         | Goat Anti-Rabbit IgG H&L<br>(Alexa Fluor® 647)       | 1:200           |
| Prolactin<br>[PRL02]                    | Mouse          | 1:200           | Thermo<br>Fisher<br>#MA5-11998         | Goat Anti-Mouse IgG H&L<br>(Alexa Fluor® 647)        | 1:200           |
| Fibroblast Surface<br>Protein<br>[1B10] | Mouse          | 1:200           | Abcam<br>#ab11333                      | Goat Anti-Mouse IgG H&L<br>(Alexa Fluor® 647)        | 1:200           |

## Supplementary References

1. Blankenship, T. N. & King, B. F. Macaque intra-arterial trophoblast and extravillous trophoblast of the cell columns and cytotrophoblastic shell express neural cell adhesion molecule (NCAM). *Anat Rec* **245**, 525-531, doi:10.1002/(SICI)1097-0185(199607)245:3<525::AID-AR9>3.0.CO;2-Q (1996).
2. Southcombe, J. H., Redman, C. W., Sargent, I. L. & Granne, I. Interleukin-1 family cytokines and their regulatory proteins in normal pregnancy and pre-eclampsia. *Clin Exp Immunol* **181**, 480-490, doi:10.1111/cei.12608 (2015).
3. Qin, F., Tian, J., Zhou, D. & Chen, L. Mst1 and Mst2 kinases: regulations and diseases. *Cell Biosci* **3**, 31, doi:10.1186/2045-3701-3-31 (2013).
4. Menkhorst, E. M. et al. Decidual-secreted factors alter invasive trophoblast membrane and secreted proteins implying a role for decidual cell regulation of placentation. *PLoS One* **7**, e31418, doi:10.1371/journal.pone.0031418 (2012).
5. Sferruzzi-Perri, A. N., Sandovici, I., Constancia, M. & Fowden, A. L. Placental phenotype and the insulin-like growth factors: resource allocation to fetal growth. *J Physiol* **595**, 5057-5093, doi:10.1113/JP273330 (2017).
6. Liu, B., Liu, L., Cui, S., Qi, Y. & Wang, T. Expression and significance of microRNA-126 and VCAM-1 in placental tissues of women with early-onset preeclampsia. *J Obstet Gynaecol Res* **47**, 2042-2050, doi:10.1111/jog.14732 (2021).
7. Giudice, L. C. et al. Identification and regulation of the IGFBP-4 protease and its physiological inhibitor in human trophoblasts and endometrial stroma: evidence for paracrine regulation of IGF-II bioavailability in the placental bed during human implantation. *J Clin Endocrinol Metab* **87**, 2359-2366, doi:10.1210/jcem.87.5.8448 (2002).
8. Taracha, A., Kotarba, G. & Wilanowski, T. Neglected Functions of TFCP2/TFCP2L1/UBP1 Transcription Factors May Offer Valuable Insights into Their Mechanisms of Action. *Int J Mol Sci* **19**, doi:10.3390/ijms19102852 (2018).
9. Altmae, S. et al. Endometrial gene expression analysis at the time of embryo implantation in women with unexplained infertility. *Molecular human reproduction* **16**, 178-187, doi:10.1093/molehr/gap102 (2010).
10. Flood-Nichols, S. K. et al. Elevated ratio of maternal plasma ApoCIII to ApoCII in preeclampsia. *Reprod Sci* **18**, 493-502, doi:10.1177/1933719110390390 (2011).
11. Wen, H., Hu, Y., Chen, L., Zhao, L. & Yang, X. miR-338-5p Targets Epidermal Growth Factor-Containing Fibulin-Like Extracellular Matrix Protein 1 to Inhibit the Growth and Invasion of Trophoblast Cells in Selective Intrauterine Growth Restriction. *Reprod Sci* **27**, 1357-1364, doi:10.1007/s43032-020-00160-3 (2020).
12. Pierzchalski, K. et al. Retinoic acid biosynthesis is impaired in human and murine endometriosis. *Biology of reproduction* **91**, 84, doi:10.1095/biolreprod.114.119677 (2014).
13. Altmae, S., Kallak, T. K., Friden, B. & Stavreus-Evers, A. Variation in hyaluronan-binding protein 2 (HABP2) promoter region is associated with unexplained female infertility. *Reprod Sci* **18**, 485-492, doi:10.1177/1933719110388849 (2011).
14. Blankenship, T. N. & King, B. F. Macaque intra-arterial trophoblast and extravillous trophoblast of the cell columns and cytotrophoblastic shell express neural cell adhesion molecule (NCAM). *Anat Rec* **245**, 525-531, doi:10.1002/(SICI)1097-0185(199607)245:3<525::AID-AR9>3.0.CO;2-Q (1996).
15. Degrelle, S. A., Gerbaud, P., Leconte, L., Ferreira, F. & Pidoux, G. Annexin-A5 organized in 2D-network at the plasmalemma eases human trophoblast fusion. *Sci Rep* **7**, 42173, doi:10.1038/srep42173 (2017).

16. Nair, R. R., Khanna, A. & Singh, K. Role of inflammatory proteins S100A8 and S100A9 in pathophysiology of recurrent early pregnancy loss. *Placenta* **34**, 824-827, doi:10.1016/j.placenta.2013.06.307 (2013).
17. Thie, M. et al. Adhesiveness of the free surface of a human endometrial monolayer for trophoblast as related to actin cytoskeleton. *Mol Hum Reprod* **3**, 275-283, doi:10.1093/molehr/3.4.275 (1997).
18. Esadeg, S., He, H., Pijnenborg, R., Van Leuven, F. & Croy, B. A. Alpha-2 macroglobulin controls trophoblast positioning in mouse implantation sites. *Placenta* **24**, 912-921, doi:10.1016/s0143-4004(03)00148-6 (2003).
19. Tonissen, K. et al. Site-directed mutagenesis of human thioredoxin. Identification of cysteine 74 as critical to its function in the "early pregnancy factor" system. *J Biol Chem* **268**, 22485-22489 (1993).
20. Mouillet, J. F. et al. The expression and post-transcriptional regulation of FSTL1 transcripts in placental trophoblasts. *Placenta* **36**, 1231-1238, doi:10.1016/j.placenta.2015.09.005 (2015).
21. Lee, C. Q. E. et al. Integrin alpha2 marks a niche of trophoblast progenitor cells in first trimester human placenta. *Development* **145**, doi:10.1242/dev.162305 (2018).
22. Jiang, Y. et al. Downregulation of SPARC expression inhibits the invasion of human trophoblast cells in vitro. *PLoS One* **8**, e69079, doi:10.1371/journal.pone.0069079 (2013).
23. Kohan-Ghadr, H. R., Kadam, L., Jain, C., Armant, D. R. & Drewlo, S. Potential role of epigenetic mechanisms in regulation of trophoblast differentiation, migration, and invasion in the human placenta. *Cell adhesion & migration* **10**, 126-135, doi:10.1080/19336918.2015.1098800 (2016).
24. Matsumoto, H., Daikoku, T., Wang, H., Sato, E. & Dey, S. K. Differential expression of ezrin/radixin/moesin (ERM) and ERM-associated adhesion molecules in the blastocyst and uterus suggests their functions during implantation. *Biology of reproduction* **70**, 729-736, doi:10.1095/biolreprod.103.022764 (2004).
25. Ono, Y. et al. CD206+ M2-Like Macrophages Are Essential for Successful Implantation. *Front Immunol* **11**, 557184, doi:10.3389/fimmu.2020.557184 (2020).
26. Jang, C. W., Shibata, Y., Starmer, J., Yee, D. & Magnuson, T. Histone H3.3 maintains genome integrity during mammalian development. *Genes Dev* **29**, 1377-1392, doi:10.1101/gad.264150.115 (2015).
27. Wu, Y. et al. Serum biomarker analysis in patients with recurrent spontaneous abortion. *Mol Med Rep* **16**, 2367-2378, doi:10.3892/mmr.2017.6890 (2017).
28. Jakupoglu, C. et al. Cytoplasmic thioredoxin reductase is essential for embryogenesis but dispensable for cardiac development. *Mol Cell Biol* **25**, 1980-1988, doi:10.1128/MCB.25.5.1980-1988.2005 (2005).
29. Wang, H. M. et al. Effect of ubiquitin-proteasome pathway on mouse blastocyst implantation and expression of matrix metalloproteinases-2 and -9. *Biol Reprod* **70**, 481-487, doi:10.1095/biolreprod.103.021634 (2004).
30. Rosario, F. J. et al. Characterization of the Primary Human Trophoblast Cell Secretome Using Stable Isotope Labeling With Amino Acids in Cell Culture. *Front Cell Dev Biol* **9**, 704781, doi:10.3389/fcell.2021.704781 (2021).
31. Auerbach, S. & Brinster, R. L. Lactate dehydrogenase isozymes in the early mouse embryo. *Exp Cell Res* **46**, 89-92, doi:10.1016/0014-4827(67)90411-9 (1967).
32. Hannan, N. J. & Salamonsen, L. A. CX3CL1 and CCL14 regulate extracellular matrix and adhesion molecules in the trophoblast: potential roles in human embryo implantation. *Biol Reprod* **79**, 58-65, doi:10.1095/biolreprod.107.066480 (2008).

33. Shukla, V. et al. Microtubule depolymerization attenuates WNT4/CaMKIIalpha signaling in mouse uterus and leads to implantation failure. *Reproduction* **158**, 47-59, doi:10.1530/REP-18-0611 (2019).
34. Tapia, A., Salamonsen, L. A., Manuelpillai, U. & Dimitriadis, E. Leukemia inhibitory factor promotes human first trimester extravillous trophoblast adhesion to extracellular matrix and secretion of tissue inhibitor of metalloproteinases-1 and -2. *Hum Reprod* **23**, 1724-1732, doi:10.1093/humrep/den121 (2008).
35. Zhou, W., Santos, L. & Dimitriadis, E. Characterization of the role for cadherin 6 in the regulation of human endometrial receptivity. *Reprod Biol Endocrinol* **18**, 66, doi:10.1186/s12958-020-00624-w (2020).
36. Zhu, J. Y., Pang, Z. J. & Yu, Y. H. Regulation of trophoblast invasion: the role of matrix metalloproteinases. *Rev Obstet Gynecol* **5**, e137-143 (2012).
37. Ng, S. W., Norwitz, S. G. & Norwitz, E. R. The Impact of Iron Overload and Ferroptosis on Reproductive Disorders in Humans: Implications for Preeclampsia. *Int J Mol Sci* **20**, doi:10.3390/ijms20133283 (2019).
38. Chui, A. et al. The expression of placental proteoglycans in pre-eclampsia. *Gynecol Obstet Invest* **73**, 277-284, doi:10.1159/000333262 (2012).
39. Gonzalez, R., Mohan, H. & Unniappan, S. Nucleobindins: bioactive precursor proteins encoding putative endocrine factors? *Gen Comp Endocrinol* **176**, 341-346, doi:10.1016/j.ygcen.2011.11.021 (2012).
40. Ghule, P. N. et al. Maternal expression and early induction of histone gene transcription factor Hinfp sustains development in pre-implantation embryos. *Dev Biol* **419**, 311-320, doi:10.1016/j.ydbio.2016.09.003 (2016).
41. Kayisli, U. A., Selam, B., Demir, R. & Arici, A. Expression of vasodilator-stimulated phosphoprotein in human placenta: possible implications in trophoblast invasion. *Mol Hum Reprod* **8**, 88-94, doi:10.1093/molehr/8.1.88 (2002).
42. Fernando, S. R. et al. Expression of membrane protein disulphide isomerase A1 (PDIA1) disrupt a reducing microenvironment in endometrial epithelium for embryo implantation. *Exp Cell Res* **405**, 112665, doi:10.1016/j.yexcr.2021.112665 (2021).
43. Zhong, S., Zou, L., Zhao, Y., Hu, B. & Xie, H. Effect of different concentrations of neogenin on proliferation, apoptosis and related proliferative factors in human trophoblasts. *J Huazhong Univ Sci Technolog Med Sci* **30**, 500-504, doi:10.1007/s11596-010-0457-x (2010).
44. Aouache, R., Biquard, L., Vaiman, D. & Miralles, F. Oxidative Stress in Preeclampsia and Placental Diseases. *Int J Mol Sci* **19**, doi:10.3390/ijms19051496 (2018).
45. Southcombe, J. H., Redman, C. W., Sargent, I. L. & Granne, I. Interleukin-1 family cytokines and their regulatory proteins in normal pregnancy and pre-eclampsia. *Clin Exp Immunol* **181**, 480-490, doi:10.1111/cei.12608 (2015).
46. Popovici, R. M. et al. Gene expression profiling of human endometrial-trophoblast interaction in a coculture model. *Endocrinology* **147**, 5662-5675, doi:10.1210/en.2006-0916 (2006).
47. Ajayi, F. et al. Elevated expression of serine protease HtrA1 in preeclampsia and its role in trophoblast cell migration and invasion. *Am J Obstet Gynecol* **199**, 557 e551-510, doi:10.1016/j.ajog.2008.04.046 (2008).
48. Morita, K. et al. Peroxiredoxin as a functional endogenous antioxidant enzyme in pronuclei of mouse zygotes. *J Reprod Dev* **64**, 161-171, doi:10.1262/jrd.2018-005 (2018).
49. Biase, F. H. et al. Fine-tuned adaptation of embryo-endometrium pairs at implantation revealed by transcriptome analyses in *Bos taurus*. *PLoS Biol* **17**, e3000046, doi:10.1371/journal.pbio.3000046 (2019).

50. Kalra, S. K., Ratcliffe, S. J., Coutifaris, C., Molinaro, T. & Barnhart, K. T. Ovarian stimulation and low birth weight in newborns conceived through in vitro fertilization. *Obstetrics and gynecology* **118**, 863-871, doi:10.1097/AOG.0b013e31822be65f (2011).
51. Shi, J. W. et al. Collagen at the maternal-fetal interface in human pregnancy. *Int J Biol Sci* **16**, 2220-2234, doi:10.7150/ijbs.45586 (2020).
52. Schatten, G., Simerly, C. & Schatten, H. Microtubule configurations during fertilization, mitosis, and early development in the mouse and the requirement for egg microtubule-mediated motility during mammalian fertilization. *Proc Natl Acad Sci U S A* **82**, 4152-4156, doi:10.1073/pnas.82.12.4152 (1985).
53. Kim, T. H. et al. Loss of HDAC3 results in nonreceptive endometrium and female infertility. *Sci Transl Med* **11**, doi:10.1126/scitranslmed.aaf7533 (2019).
54. Paule, S., Li, Y. & Nie, G. Cytoskeletal remodelling proteins identified in fetal-maternal interface in pregnant women and rhesus monkeys. *J Mol Histol* **42**, 161-166, doi:10.1007/s10735-011-9319-5 (2011).
55. Wang, Y., Ma, C. H. & Qiao, J. [Differential expression of microRNA in eutopic endometrium tissue during implantation window for patients with endometriosis related infertility]. *Zhonghua Fu Chan Ke Za Zhi* **51**, 436-441, doi:10.3760/cma.j.issn.0529-567X.2016.06.007 (2016).
56. Myers, J. E. et al. Integrated proteomics pipeline yields novel biomarkers for predicting preeclampsia. *Hypertension* **61**, 1281-1288, doi:10.1161/HYPERTENSIONAHA.113.01168 (2013).
57. Bashiri, A., Halper, K. I. & Orvieto, R. Recurrent Implantation Failure-update overview on etiology, diagnosis, treatment and future directions. *Reprod Biol Endocrinol* **16**, 121, doi:10.1186/s12958-018-0414-2 (2018).
58. Ma, X. et al. Decidual cell polyploidization necessitates mitochondrial activity. *PLoS One* **6**, e26774, doi:10.1371/journal.pone.0026774 (2011).
59. Castel, G. et al. Induction of Human Trophoblast Stem Cells from Somatic Cells and Pluripotent Stem Cells. *Cell Rep* **33**, 108419, doi:10.1016/j.celrep.2020.108419 (2020).
60. Bilban, M. et al. Identification of novel trophoblast invasion-related genes: heme oxygenase-1 controls motility via peroxisome proliferator-activated receptor gamma. *Endocrinology* **150**, 1000-1013, doi:10.1210/en.2008-0456 (2009).
61. San Martin, S. & Zorn, T. M. The small proteoglycan biglycan is associated with thick collagen fibrils in the mouse decidua. *Cell Mol Biol (Noisy-le-grand)* **49**, 673-678 (2003).
